# Supplementary material for: Trends in Obesity and Overweight in Oregon Children With Down Syndrome
Source: PubMed Central journal article supplement — Glob Pediatr Health. 2019 Apr 2;6:2333794X19835640. doi: 10.1177/2333794X19835640 (PMC6446252; doi:10.1177/2333794x19835640), 2019-04-02
Supplement: Supplemental_Table.pdf [file Supplemental_Table.pdf]

Demographics and Comorbid Diagnoses for All Children in OHSU Down Syndrome Clinic Database

|                                                               | Down Syndrome Clinic |                   |
|---------------------------------------------------------------|----------------------|-------------------|
|                                                               | n = 508              | %                 |
| Age, Mean and Range (years)                                   | 6.5<br>0.05-26       |                   |
| Gender                                                        |                      |                   |
| Male                                                          | 282                  | 55.5              |
| Female                                                        | 226                  | 44.5              |
| Ethnicity (n=494)                                             |                      |                   |
| Non-Hispanic/Latino                                           | 336                  | 68.0              |
| Hispanic/Latino                                               | 158                  | 32.0              |
| Karyotype (n= 448)                                            |                      |                   |
| 47, XX/ 47, XY                                                | 420                  | 93.8              |
| 46 XX, t(14;21)/ 46 XY, t(14;21)                              | 6                    | 1.3               |
| Other (mosaic, other translocations)                          | 22                   | 4.9               |
| Unknown                                                       | 60                   |                   |
| Primary Language at Home (n = 506)                            |                      |                   |
| English                                                       | 372                  | 73.5              |
| Spanish                                                       | 109                  | 21.5              |
| Other                                                         | 25                   | 4.9               |
| Congenital Cardiac Disease                                    |                      |                   |
| No                                                            | 160                  | 31.5              |
| Yes                                                           | 348                  | 68.5              |
| Required Surgery                                              | 145                  | 41.6 <sup>a</sup> |
| Visual Impairment<br>(including astigmatism, strabismus)      | 312                  | 61.4              |
| Hearing Impairment<br>(including pressure equalization tubes) | 270                  | 53.2              |
| Sleep Apnea                                                   | 154                  | 30.3              |
| Gastrointestinal Atresia<br>(duodenal, anal, other)           | 27                   | 5.3               |
| Seizure Disorder                                              | 26                   | 5.1               |
| Autism Spectrum Disorder                                      | 25                   | 4.9               |
| Undescended Testicles<br>(one or both; males only)            | 21                   | 7.5               |
| Celiac Disease                                                | 19                   | 3.7               |
| Hirschsprung                                                  | 14                   | 2.8               |
| Leukemia/Myeloproliferative Disorder                          | 15                   | 3.0               |
| Type I Diabetes                                               | 4                    | 0.8               |

<sup>a</sup>Percent of patients requiring cardiac surgery is taken only from patients with cardiac disease.
